# Supplementary material for: Tumor-Specific Imaging with Angiostamp800 or Bevacizumab-IRDye 800CW Improves Fluorescence-Guided Surgery over Indocyanine Green in Peritoneal Carcinomatosis
Source: MDPI journal article supplement (doi:10.3390/biomedicines10051059), 2022-05-03
Supplement: s1 [file s1]

**Table S1: Molecular probes and device**

|                                                                      | <u><b>Molecular probes</b></u>                                |                                            |                                                 | <u><b>Device</b></u>                                |
|----------------------------------------------------------------------|---------------------------------------------------------------|--------------------------------------------|-------------------------------------------------|-----------------------------------------------------|
|                                                                      | <b>Bevacizumab-IRDye 800CW</b><br>SurgVision<br>(Netherlands) | <b>Angiostamp800</b><br>Fluoptics (France) | <b>Indocyanine Green (ICG)</b><br>SERB (France) | <b>Fluobeam®800</b><br>Fluoptics (France)           |
| Absorbance and emission peaks                                        | Abs: 774 nm<br>Em: 789 nm                                     | Abs: 781 nm<br>Em: 794 nm                  | Abs: 790 nm<br>Em: 830 nm                       | Excitation: 780 nm laser light<br>Emission: >830 nm |
| Extinction coefficient x1000<br>(cm <sup>-1</sup> .M <sup>-1</sup> ) | 240                                                           | Unknown                                    | 120                                             |                                                     |
| Fluorescence quantum yields                                          | 0.14                                                          | Unknown                                    | 0.027                                           |                                                     |
| Fluorescence engraftment rate                                        | 1.4                                                           | 1                                          | No engraftment                                  |                                                     |
| Molecular target<br>Kd                                               | VEGF<br>1.8-20 nM                                             | $\alpha_v\beta_3$ integrin<br>3.9 nM       | -                                               |                                                     |

The values were obtained from the Manufacturers.
