# Supplementary material for: Tumor-Specific Imaging with Angiostamp800 or Bevacizumab-IRDye 800CW Improves Fluorescence-Guided Surgery over Indocyanine Green in Peritoneal Carcinomatosis
Source: MDPI journal article supplement (doi:10.3390/biomedicines10051059), 2022-05-03
Supplement: s1 [file s1]

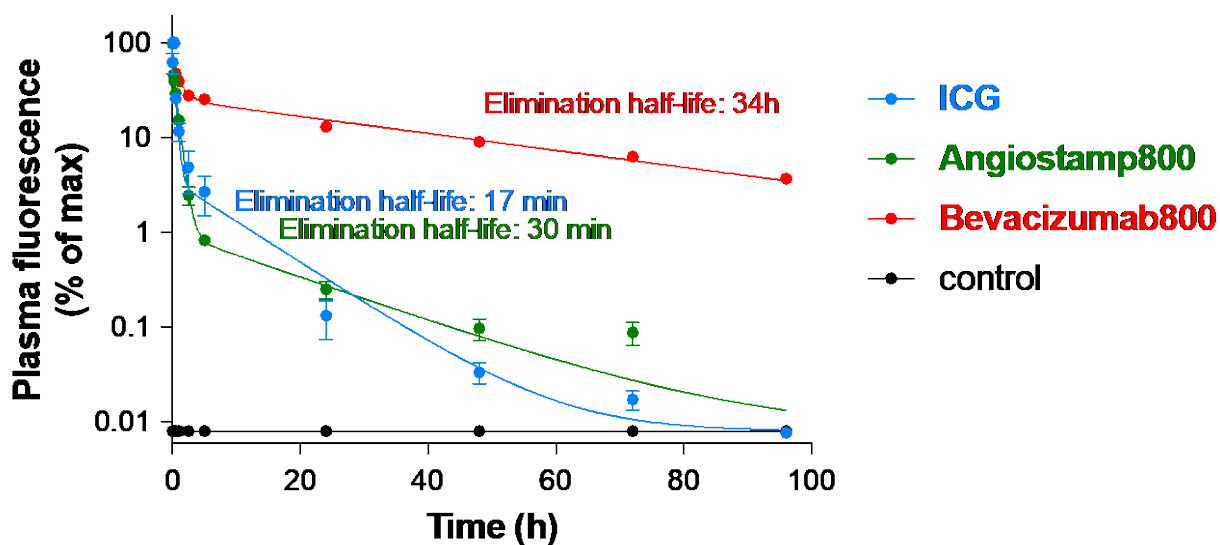

**Figure S2** Bevacizumab-IRDye 800CW had longer circulation time in the blood than Angiostamp800 and ICG. Healthy mice were injected intravenously with Angiostamp800, Bevacizumab-IRDye 800CW, or ICG, and fluorescence imaging of blood plasma samples collected at different time points were performed. Results are expressed as a percentage of the initial maximum signal (mean  $\pm$  SEM; n = 3).
