# Supplementary material for: Tumor-Specific Imaging with Angiostamp800 or Bevacizumab-IRDye 800CW Improves Fluorescence-Guided Surgery over Indocyanine Green in Peritoneal Carcinomatosis
Source: MDPI journal article supplement (doi:10.3390/biomedicines10051059), 2022-05-03
Supplement: s1 [file s1]

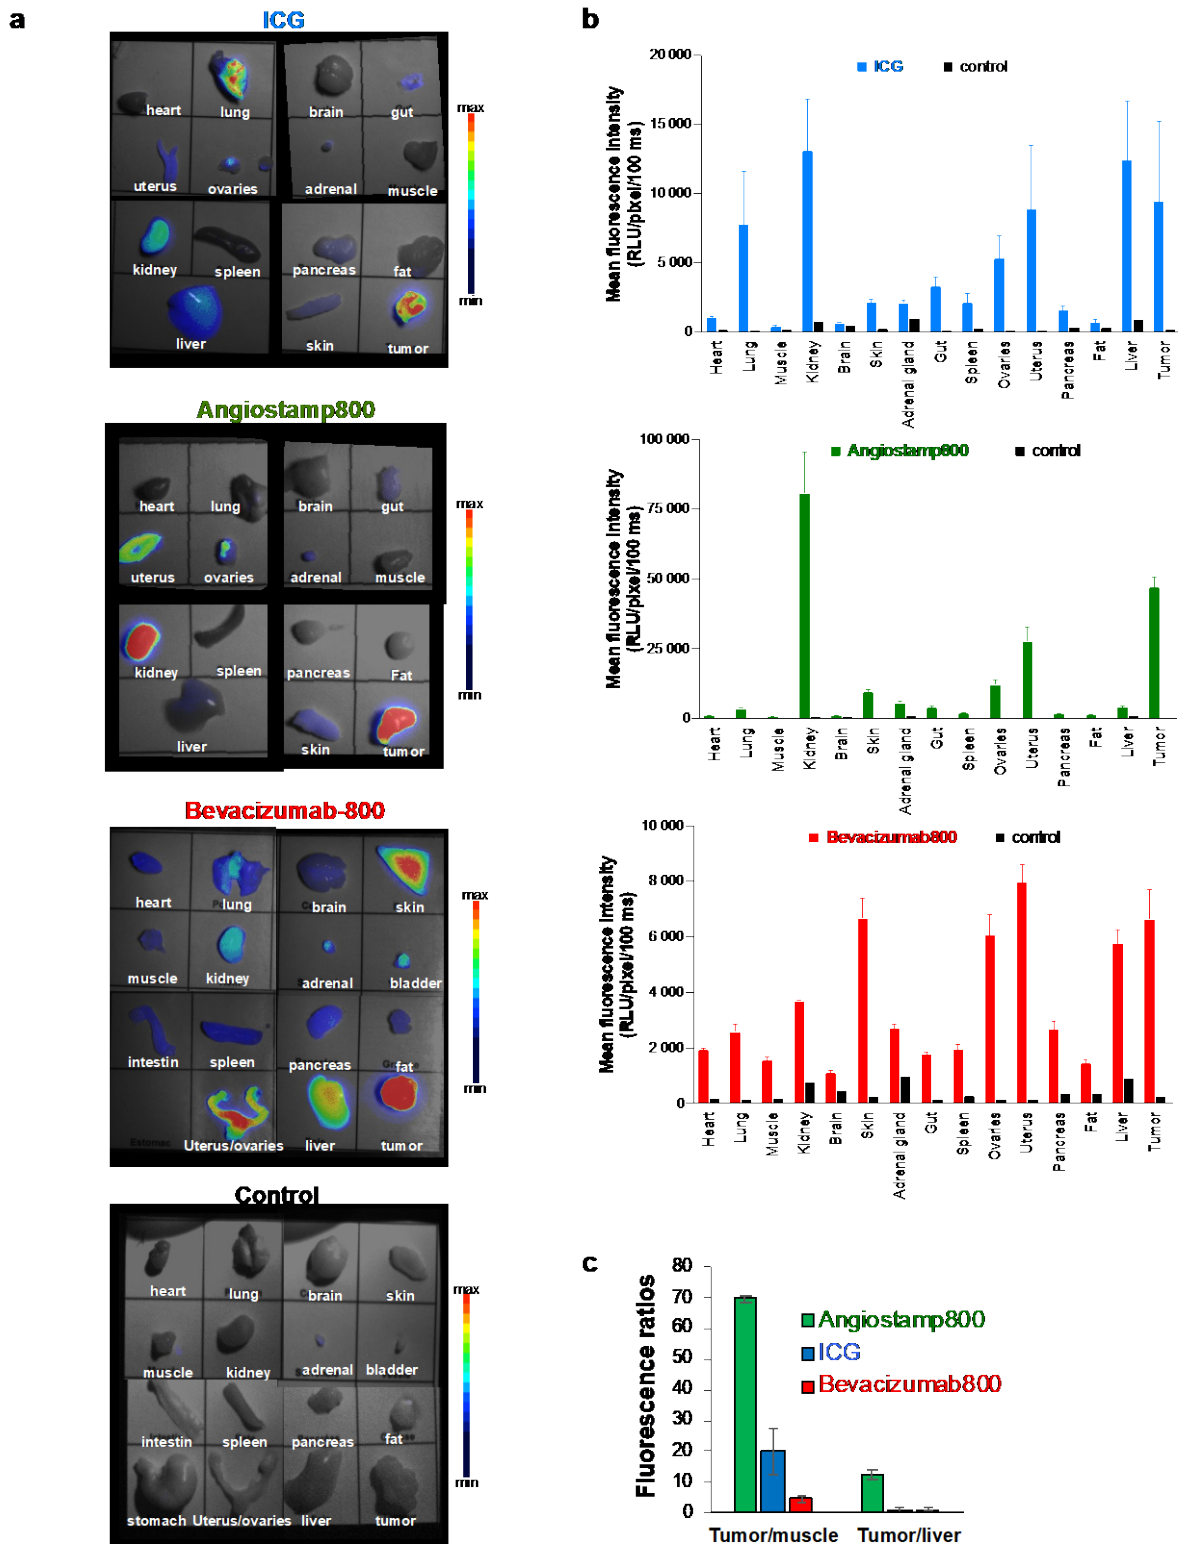

**Figure S4** Angiostamp800, Bevacizumab-IRDye 800CW, and ICG accumulated in subcutaneous SKOV3 tumors *ex vivo*. **a**: Representative fluorescence images of isolated organs collected 24 h after intravenous injection of Angiostamp800 and ICG (50 ms integration time, min-max: 2028-25931), and

in non-injected mouse (control), or 96 h after intravenous injection of Bevacizumab-IRDye 800CW (500 ms integration time, min-max: 4007-39839). **b:** Fluorescence images were performed on isolated organs. ROIs are defined on the extracted organs to semi-quantify the amount of photons detected per pixel. The results are expressed as the mean (RLU/pixel/100 ms)  $\pm$  SEM in SKOV3 tumor-bearing mice (n = 3) and non-injected mice (control). **c:** ROIs were defined on tumor, liver, and muscle to semi-quantify the amount of photons detected per pixel. The results are expressed as the mean tumor-to-muscle and tumor-to-liver fluorescence ratios  $\pm$  SEM (n=6) at 24 h (Angiostamp800 and ICG, n = 4), or 96 h (Bevacizumab-IRDye 800CW, n = 6).
