# Supplementary material for: Tumor-Specific Imaging with Angiostamp800 or Bevacizumab-IRDye 800CW Improves Fluorescence-Guided Surgery over Indocyanine Green in Peritoneal Carcinomatosis
Source: Biomedicines. 2022 May 3;10(5):1059. doi: 10.3390/biomedicines10051059 (PMC9138305; doi:10.3390/biomedicines10051059)
Supplement: Supplementary file 1 [file biomedicines-10-01059-s001.zip]

Archive with 7 entries (7 files):
- Supplementary_Figure_S1.pdf
- Supplementary_Figure_S2.pdf
- Supplementary_Figure_S3.pdf
- Supplementary_Figure_S4.pdf
- Supplementary_Figure_S5.pdf
- Supplementary_Methods.pdf
- Supplementary_Table_S1.pdf
